# 1 The TMEM16A Channel Mediates the fast polyspermy block in *Xenopus* 2 *laevis*

3  
4  
5 Katherine L. Wozniak<sup>1</sup>, Wesley A. Phelps<sup>1</sup>, Maiwase Tembo<sup>1</sup>, Miler T. Lee<sup>1</sup>, and Anne E.  
6 Carlson<sup>1</sup>

7  
8 <sup>1</sup>Department of Biological Sciences, University of Pittsburgh, Pittsburgh PA 15260

9  
10 Correspondence: [acarlson@pitt.edu](mailto:acarlson@pitt.edu) (A.E.C.)

## 11 **KEYWORDS**

12  
13  
14 Fertilization, TMEM16A, BEST2, Calcium activated chloride channel, *Xenopus laevis*, Fast  
15 polyspermy block, Egg, Sperm, Uncage IP<sub>3</sub>

## 16 **ABSTRACT**

17 In externally fertilizing animals, such as sea urchins and frogs, prolonged depolarization of the  
18 egg immediately after fertilization inhibits the entry of additional sperm – a phenomenon known  
19 as the fast block to polyspermy. In the African clawed frog, *Xenopus laevis*, this depolarization is  
20 driven by a Ca<sup>2+</sup>-activated Cl<sup>-</sup> efflux. Although the prominent Ca<sup>2+</sup>-activated Cl<sup>-</sup> currents  
21 generated by immature *X. laevis* oocytes are conducted by xTMEM16A channels, little is known  
22 about which channels contribute to fertilization-competency in mature eggs. Moreover, the  
23 gamete undergoes a gross transformation as it matures from an immature oocyte into a  
24 fertilization-competent egg. Here we report the results of our approach to identify the Ca<sup>2+</sup>-  
25 activated Cl<sup>-</sup> channel that triggers the fast block. Querying published proteomics and RNA-seq  
26 data, we identified two Ca<sup>2+</sup>-activated Cl<sup>-</sup> channels expressed in fertilization-competent *X. laevis*  
27 eggs: xTMEM16A and xBEST2A. Furthermore, transcripts for these channels increase in  
28 abundance during gamete maturation. To determine if either of these mediates the fast block,  
29 we characterized exogenously expressed xTMEM16A and xBEST2A using pharmacologic  
30 inhibitors. None of the inhibitors tested blocked xBEST2A currents specifically. However, Ani9  
31 and MONNA each reduced xTMEM16A currents by more than 70%, while only nominally  
32 inhibiting those generated by xBEST2A. Using whole-cell recordings during fertilization, we  
33 found that Ani9 and MONNA effectively diminished fertilization-evoked depolarizations. These  
34 results indicate that fertilization activates TMEM16A channels in *X. laevis* eggs and induces the  
35 earliest known event triggered by fertilization: the fast block to polyspermy.  
36  
37

## 38 **HIGHLIGHTS**

- 39  
40
- 41 • Protein for the channels xBEST2A and xTMEM16A is present in *X. laevis* eggs.
  - 42 • The inhibitors MONNA and Ani9 effectively block xTMEM16A compared to xBEST2A.
  - 43 • *Xenopus laevis* fertilization opens TMEM16A to trigger egg depolarization.
  - 44 • The TMEM16A-mediated depolarization is critical for the fast block to polyspermy.
- 45  
46

## 47 INTRODUCTION

48 Fertilization of an egg by more than one sperm, a condition known as polyspermy,  
49 presents one of the earliest and most prevalent barriers to successful reproduction. In most  
50 sexually reproducing species polyspermy causes chromosomal abnormalities that are  
51 embryonic lethal [1]. Eggs have evolved multiple strategies to combat the entry of sperm into an  
52 already fertilized egg and to thereby avoid such catastrophic consequences [2]; however, the  
53 underlying molecular mechanisms are still poorly understood.

54 The two most common strategies for preventing polyspermy are the *fast block* and the  
55 *slow block* [3]. As their names imply, these mechanisms differ with respect to how quickly they  
56 occur. The fast block involves depolarization of the egg and occurs within seconds of fertilization  
57 [4]. Cross-species fertilization experiments demonstrated that sperm possess a voltage sensor  
58 that prevents their entry into a depolarized egg [5]; by a yet unknown mechanism, this voltage  
59 sensor allows sperm to detect whether an egg is depolarized and thus already fertilized. By  
60 contrast, the slow block involves the creation of a physical barrier surrounding the nascent  
61 zygote and takes several minutes to complete [1, 6]. Whereas the slow block occurs in all  
62 sexually reproducing species, the fast block is limited to externally fertilizing organisms, in which  
63 the sperm-to-egg ratio can be extremely high [4, 7, 8].

64 The fast block has been documented in diverse externally fertilizing organisms (*reviewed*  
65 *by* [9]), including fucoid algae [10], sea urchins [4], starfish [11], marine worms [12], and  
66 amphibians [7, 13]. For example, the African clawed frog *Xenopus laevis* is an externally  
67 fertilizing species that uses the fast block. The second messengers that trigger these fast blocks  
68 and the channels that conduct the depolarizing currents have not been identified in any species.  
69 Due to evolutionary distance and differences in habitat among these species, the precise  
70 mechanisms are likely to vary. Nevertheless, eggs capable of undergoing the fast block share  
71 three characteristics: their fertilization-preventing membrane depolarization, known as the  
72 *fertilization potential*, persists for one minute or more [4, 14] and is distinct from action potentials  
73 in other excitable cells such as neurons or cardiac myocytes [15]; when held at a depolarizing  
74 voltage of this kind, the eggs can be bound, but not entered, by sperm, even if unfertilized [4];  
75 and when held at hyperpolarized potentials, the eggs can be fertilized by multiple sperm [4].

76 As in all frogs, the *X. laevis* fast block requires an increase of cytosolic  $\text{Ca}^{2+}$  and a  
77 depolarizing efflux of  $\text{Cl}^-$  [7, 14, 16, 17]; an event hypothesized to be mediated by a  $\text{Ca}^{2+}$ -  
78 activated  $\text{Cl}^-$  channel (CaCC) [18, 19]. In eggs loaded with the  $\text{Ca}^{2+}$ -chelator BAPTA, fertilization  
79 failed to evoke a depolarization or cleave the egg, thereby linking the absence of an electrical  
80 event with an absence of a developmental event [20]. Moreover, treating eggs with a  $\text{Ca}^{2+}$   
81 ionophore, a lipid soluble compound that transports  $\text{Ca}^{2+}$  across the plasma membrane and  
82 increases intracellular  $[\text{Ca}^{2+}]$ , evoked a depolarization in the absence of fertilization [14]. The  
83 ionophore signaled depolarization demonstrated that increased intracellular  $\text{Ca}^{2+}$  is sufficient to  
84 trigger the fast block. A requirement for a  $\text{Cl}^-$  efflux was demonstrated by larger fertilization-  
85 evoked depolarizations recorded from eggs inseminated in low extracellular  $\text{Cl}^-$  and smaller  
86 depolarizations recorded from eggs inseminated in high extracellular  $\text{Cl}^-$  [14, 17]. Furthermore,  
87 replacing the dominant extracellular halide from  $\text{Cl}^-$  to  $\text{Br}^-$  or  $\text{I}^-$  led to no changes in membrane  
88 polarization or hyperpolarizations with fertilization, respectively [14]. Under these conditions, the  
89 magnitude and direction of the fertilization-evoked depolarization was directly linked to  
90 polyspermy. For example, multiple sperm penetrated all eggs inseminated in  $\text{I}^-$  compared to  
91 mostly monospermic inseminations in  $\text{Cl}^-$  [14]. Finally, insemination in  $\text{Br}^-$  resulted in an  
92 intermediate effect, with a mixture of monospermic and polyspermic embryos [14]. Together  
93 these experiments revealed both a prominent role for cytosolic  $\text{Ca}^{2+}$  increase and a  $\text{Cl}^-$  current  
94 in the fast block, and underscored the importance of a fertilization-evoked depolarization for  
95 ensuring monospermic fertilization. Here we sought to identify the  $\text{Ca}^{2+}$ -activated  $\text{Cl}^-$  channel  
96 (CaCC) that mediates the fast block in *X. laevis*.

97 The channels expressed in the fertilization-competent *X. laevis* egg are not well studied,  
98 which is in stark contrast to the well-characterized channels found in the immature oocyte [e.g.  
99 21]. Indeed, the oocytes and eggs of *X. laevis* are vastly different cells (Figure 1) [22].  
100 Immature oocytes are located in the ovary, are arrested in prophase I, and cannot be fertilized.  
101 By contrast, eggs are located outside the *X. laevis* female (following ovulation and laying), are  
102 arrested in metaphase II, and are fertilization-competent (i.e. gametes). As the oocyte matures  
103 into an egg, many ion channels and transporters are internalized, including: Orai1, the pore-  
104 forming subunit of the store-operated Ca(2+) entry channel [23]; the plasma membrane Ca<sup>2+</sup>-  
105 ATPase (PMCA) [24]; and Na<sup>+</sup>/K<sup>+</sup> ATPase [25]. In addition, oocyte maturation induces  
106 intracellular proteins that closely interact with the plasma membrane, including components of  
107 the cytoskeleton, to undergo transformations in their structural contacts [26]. Therefore,  
108 experimental findings regarding prominent CaCCs, namely TMEM16A [21], in *X. laevis* oocytes  
109 cannot be directly applied to eggs in the absence of further testing, and thus it was necessary to  
110 study the CaCCs in eggs directly.

111 We sought to identify the channel that mediates the fast block in *X. laevis* eggs. Using  
112 existing proteomic and transcriptomic data from *X. laevis* oocytes and eggs [27, 28], we  
113 identified two candidate CaCCs: transmembrane protein 16 type a (TMEM16A) [21, 29, 30] and  
114 bestrophin 2a (BEST2A) [31, 32]. To distinguish between the currents produced by the *X. laevis*  
115 orthologs of these channels (xTMEM16A and xBEST2A), we exogenously expressed and  
116 pharmacologically characterized each. By applying this approach to whole-cell recordings of *X.*  
117 *laevis* eggs during fertilization, we demonstrate that it is xTMEM16A, and not xBEST2A, that  
118 produces the depolarizing current. Thus, we describe the first known ion channel that mediates  
119 the fast block.

## 120 121 RESULTS

122 **Two candidate CaCCs accumulate in the egg and are candidates for the trigger of the fast**  
123 **block.** To identify candidate CaCCs that may trigger the fast block in *X. laevis*, we interrogated  
124 two previously published high-throughput gene expression datasets. First, we examined the  
125 proteome of fertilization-competent eggs [24] and queried for all known ion channels (Figure S1  
126 and Dataset S1). Three protein families containing CaCCs have been characterized to date: the  
127 CLCAs, the bestrophins (BEST), and the transmembrane protein 16s (TMEM16/ANO) [33]. We  
128 discovered that only one member of the BEST family, xBEST2A, and three members of the  
129 TMEM16 family, xTMEM16A, xTMEM16E and xTMEM16K, are represented in the egg  
130 proteome (Figure 2). Second, we examined an RNA-seq time course in *X. laevis* oocytes and  
131 unfertilized eggs [27]. All four types of mRNA show increasing levels through gamete  
132 development, culminating in the egg (Figure 2). Although *ano6* and *clca3p-like* mRNA are  
133 present, it is likely that they are expressed after fertilization to guide the developing embryo  
134 through the maternal-to-zygotic transition, since their proteins are not detected in the unfertilized  
135 egg [34, 35].

136 Both xBEST2A and xTMEM16A were originally cloned from fertilization-incompetent, *X.*  
137 *laevis* oocytes [21, 36], and each has been characterized as plasma membrane-localized [21,  
138 36-38]. Moreover, xTMEM16A is the prominent CaCC in *X. laevis* oocytes [21]. In contrast,  
139 TMEM16E localizes to the endoplasmic reticulum (ER) where it functions as a Ca<sup>2+</sup>-activated  
140 scramblase [39, 40]. TMEM16K similarly localizes to the ER [41, 42]. Because both TMEM16E  
141 and TMEM16K proteins localize to the ER, they are not capable of passing the depolarizing Cl<sup>-</sup>  
142 current of the fast block, and were therefore excluded both from further consideration. Together,  
143 these analyses suggest that the fast block to polyspermy in *X. laevis* eggs is mediated by either  
144 xBEST2A or xTMEM16A.

145

146 **Uncaging IP<sub>3</sub> activates xTMEM16A and xBEST2A.** Having discovered two CaCCs as  
147 candidates for the channel that mediates the fast block in *X. laevis* eggs, we sought to  
148 distinguish between their currents in the context of fertilization. Studying the activities of  
149 xTMEM16A and xBEST2A independently necessitated their exogenous expression. For this  
150 purpose, we chose a highly tractable system that lacks endogenous Ca<sup>2+</sup>-activated currents:  
151 *Ambystoma mexicanum* (axolotl) oocytes.

152 Although xTMEM16A was previously expressed in axolotl oocytes and currents  
153 generated in this context have been recorded [18], this is not the case for xBEST2A. We first  
154 confirmed that the exogenously expressed xBEST2A is localized to the plasma membrane of  
155 these oocytes. Confocal imaging of axolotl oocytes expressing both Ruby-tagged xBEST2A and  
156 the eGFP-tagged membrane marker MemE [43] revealed that xBEST2A was indeed expressed  
157 in these cells, and that it was transported to the plasma membrane (Figure 3A). As expected, no  
158 fluorescence was detected in water-injected control oocytes (Figure 3A).

159 To study the currents conducted by xTMEM16A and xBEST2A, we exploited their  
160 shared regulation by Ca<sup>2+</sup>. Specifically, we photoactivated caged IP<sub>3</sub> [21, 31, 32] by exposing  
161 the oocytes to ultraviolet light. This uncaging of IP<sub>3</sub> induces Ca<sup>2+</sup> release from the ER, thereby  
162 increasing the intracellular Ca<sup>2+</sup> concentration and activating the channels (Figure 3B). As  
163 shown previously [21], uncaging IP<sub>3</sub> in wildtype axolotl oocytes does not elicit any Ca<sup>2+</sup>-induced  
164 currents (Figure 3C). Importantly, we used the splice variants of xTMEM16A and xBEST2A  
165 channels that are present in *X. laevis* eggs [21, 36].

166 Using the uncaging system in conjunction with the two-electrode voltage clamp (TEVC),  
167 we recorded whole-cell currents in the presence or absence of known channel inhibitor  
168 molecules. Our initial assessment of the effects of sequential uncaging events in the absence of  
169 inhibitors revealed no differences in current between axolotl oocytes expressing either of the  
170 channels or *X. laevis* oocytes expressing the endogenous channels (Table S1). This finding  
171 indicated that differences in Ca<sup>2+</sup>-evoked currents measured in the presence or absence of an  
172 inhibitor in this system would reflect the efficacy of that inhibitor, thus this experimental design  
173 would enable us to characterize the efficacy of inhibitors in reducing xTMEM16A- or xBEST2A-  
174 mediated currents.

175 Using this set-up, we quantified the effects of five inhibitors on xTMEM16A- and  
176 xBest2a-mediated currents (Table S1). Three of these – MONNA, Ani9, and T16A<sub>inh</sub>-A01 – were  
177 previously reported to target human and/or mouse TMEM16A [44-46], whereas CaCC<sub>inh</sub>-A01 is  
178 a general inhibitor of CaCCs [44, 47]. Although no BEST-specific inhibitor has been  
179 characterized to date, we included the broad-spectrum Cl<sup>-</sup> channel inhibitor DIDS because it  
180 reportedly binds to human bestrophin 1 (hBEST1) channels with an affinity 160-fold higher than  
181 that for mouse TMEM16A (mTMEM16A) [48].

182  
183 **MONNA and Ani9 inhibit xTMEM16A currents.** To characterize the effects of each inhibitor,  
184 we applied them to the above-described oocytes. In the case of xTMEM16A, both MONNA and  
185 Ani9 effectively reduced currents in the axolotl oocytes by over 70% (Figs. 3D & S2, Table S1),  
186 whereas T16A<sub>inh</sub>-A01 and CaCC<sub>inh</sub>-A01 were much less effective (Table S1, Figure S2).  
187 Unexpectedly, we found that 7.5 μM DIDS, a concentration well below the reported IC<sub>50</sub> for the  
188 drug on mTMEM16A [48], reduced xTMEM16A by almost 50% (Table S1, Figure S2).

189 In *X. laevis* oocytes, the prominent Ca<sup>2+</sup>-activated Cl<sup>-</sup> current is known to be generated  
190 by xTMEM16A channels [21]. Comparison of the effects on xTMEM16A-mediated current in the  
191 axolotl oocytes to the endogenous TMEM16A-passed currents generated in *X. laevis* oocytes  
192 revealed that in nearly all cases the efficacy of the inhibitors was very similar in the two test  
193 groups (Figure 3E & S2, Table S1). The exception is that MONNA blocked significantly more  
194 xTMEM16A current in the *X. laevis* oocyte (87 ± 2%) than in the axolotl oocytes (72 ± 3%)



195 ( $P < 0.05$  ANOVA with post-hoc HSD Tukey; Table S1). Collectively, these data demonstrate that  
196 only MONNA and Ani9 effectively inhibit xTMEM16A.

197  
198 **MONNA and Ani9 discriminate between currents generated by xTMEM16A and xBEST2A.**

199 Comparison of the effects of the five inhibitors on xBEST2A currents revealed that none had a  
200 significant effect ( $P > 0.05$ , ANOVA with post-hoc HSD Tukey; Figure 3F & S2 and Table S1).  
201 Most notably, currents generated in the presence of MONNA or Ani9 were no different than  
202 those produced in the control, confirming that these two compounds are specific for  
203 xTMEM16A. Furthermore, the lack of xBEST2A inhibition by MONNA and Ani9 demonstrates  
204 that these inhibitors do not interfere with the IP<sub>3</sub>-induced Ca<sup>2+</sup> release pathway. Together, these  
205 results demonstrate that MONNA and Ani9 effectively target xTMEM16A channels but have only  
206 minimal effects on xBEST2A and the IP<sub>3</sub> receptor, thereby providing a mechanism for discerning  
207 between xTMEM16A and xBEST2A currents during the fast block.

208  
209 **The TMEM16A mediated-current produces the fast block in *X. laevis*.** To characterize the  
210 fast block to polyspermy, we conducted whole-cell recording of *X. laevis* eggs during fertilization  
211 (Figure 4A). Eggs with steady resting potentials were inseminated with sperm and currents were  
212 recorded for up to 40 minutes or until the cortex contracted (indicating that fertilization was  
213 successful) (Figure 4B). Figure 4C depicts a typical fertilization-evoked depolarization that  
214 occurred after sperm addition. For eggs inseminated under control conditions, we found that:  
215 the resting potential was  $-19.2 \pm 1.0$  mV; the fertilization potential was  $3.7 \pm 2.3$  mV (N=30,  
216 Figure 4D); the time between the addition of sperm and the onset of membrane depolarization  
217 (which likely represents the time required for the sperm to penetrate the viscous jelly coat of the  
218 egg [16]) was approximately  $4.9 \pm 0.7$  minutes (N=30, Figure 4E); and the average rate of  
219 depolarization was  $9.0 \pm 3.4$  mV/ms (N=30) (Figure 4F).

220 To determine whether it is xTMEM16A or xBEST2A that conducts the depolarizing  
221 current responsible for the fast block, we inseminated eggs in the presence of MONNA or Ani9,  
222 each of which was expected to inhibit xTMEM16A but to have minimal effect on xBEST2a or IP<sub>3</sub>  
223 receptors (Figure 3G, Table S1). In *X. laevis* eggs, inhibition of xTMEM16A using either inhibitor  
224 effectively diminished the fast block. In the presence of 10  $\mu$ M MONNA, fertilization failed to  
225 evoke depolarization in seven independent experiments (Figure 4G); thus, this inhibitor  
226 completely abolished the fast block. Eggs incubated in MONNA had a significantly more positive  
227 resting potential than that of control eggs ( $-12.8 \pm 0.8$  mV vs.  $-19.2 \pm 1.0$  mV, T-test,  $P < 0.001$ )  
228 (Figure 4D). However, this elevated resting potential did not interfere with fertilization; visual  
229 assessment revealed contraction of the animal pole followed by the appearance of a cleavage  
230 furrows (Figure 4B), thus demonstrating that all eggs inseminated in the presence of MONNA  
231 initiated embryonic development.

232 In the presence of 1  $\mu$ M Ani9, the rate of depolarization for inseminated eggs was  
233 significantly reduced, and thereby attenuating the fast block ( $1.2 \pm 1.1$  mV/ms with Ani9 (N=5)  
234 vs  $9.0 \pm 3.4$  mV/ms in control (N=30), T-test,  $P < 0.05$ ) (Figure 4F & 4H). Because the rate of  
235 depolarization is proportional to the number of channels that are open, a slower rate reflects  
236 fewer channels being activated by fertilization. Based on the rates measured, we estimate that  
237 in the presence of 1  $\mu$ M Ani9, 7.5-fold fewer channels were triggered to open by fertilization; i.e.,  
238 only 13% of the channels that would be activated under normal conditions opened in this  
239 context. This 87% reduction in the number of open channels is consistent with the 80%  
240 inhibition of xTMEM16A channels measured when IP<sub>3</sub> was uncaged in *X. laevis* and axolotl  
241 oocytes (Figure 3G, Table S1). No other metrics of the fast block differed significantly in  
242 recordings made in the presence vs. absence of Ani9 (Figure 4D – 4F).

243 Collectively, the inability of fertilization to depolarize an egg in the presence of MONNA  
244 and the slowed rate of depolarization in the presence of Ani9 demonstrate that TMEM16A  
245 channels produce the depolarizing current that mediates the fast block in *X. laevis* eggs.

246  
247  
248  
249  
250  
251  
252  
253  
254  
255  
256  
257  
258  
259  
260  
261  
262  
263  
264  
265  
266  
267  
268  
269  
270  
271  
272  
273  
274  
275  
276  
277  
278  
279  
280  
281  
282  
283  
284  
285  
286  
287  
288  
289  
290  
291  
292  
293  
294  
295  
296

## DISCUSSION

The fast block to polyspermy is one of the earliest and most prevalent events across species that undergo external fertilization. Despite its widespread use by evolutionarily divergent species, the signaling pathways that underlie these fertilization-evoked depolarizations have remained elusive. Here we identify the CaCC that mediates the fast block in the African clawed frog *X. laevis*: xTMEM16A (Figure 5). Given that an increase in the intracellular  $\text{Ca}^{2+}$  concentration and an efflux of  $\text{Cl}^-$  are required for the fast block in all frogs and toads studied thus far [7, 49], we propose that the current produced by TMEM16A channels triggers the fast block to polyspermy in all anurans.

Our identification of xTMEM16A and xBEST2A as candidate CaCCs that may mediate the fast block is based on proteomics and transcriptomics. Indeed, both proteins are translated in high concentrations (approximately  $22 \times 10^9$  xTMEM16A channels and  $2 \times 10^9$  xBEST2A channels, see Methods) in mature eggs. Given that these channels are present in the egg membrane, it was feasible that either or both could mediate the  $\text{Ca}^{2+}$ -activated  $\text{Cl}^-$  efflux that drives the fast block in *X. laevis*.

Our finding that 10  $\mu\text{M}$  MONNA and 1  $\mu\text{M}$  Ani9, concentrations higher than their published  $\text{IC}_{50}$  [45, 46], inhibit >70% of xTMEM16A channels in both axolotl and *X. laevis* oocytes, yet that they are largely ineffective at reducing currents conducted by xBEST2A, strongly indicate that these inhibitors discriminate between our two candidate CaCCs. Both of these inhibitors are known to be highly specific for TMEM16A, with Ani9 failing to block even the closest relative of TMEM16A, TMEM16B [46]. In contrast, T16<sub>inh</sub>-A01, and CaCC<sub>inh</sub>-A01 were much less effective at inhibiting either xTMEM16A or xBEST2A. The similarity between the pharmacological profiles of xTMEM16A currents recorded in axolotl oocytes and endogenous  $\text{Ca}^{2+}$ -activated currents in *X. laevis* oocytes supports the hypothesis that the native  $\text{Ca}^{2+}$ -activated  $\text{Cl}^-$  currents in *X. laevis* oocytes are generated by xTMEM16A channels [21].

Although MONNA and Ani9 inhibited exogenously expressed xTMEM16A in axolotl oocytes to similar extents, MONNA was significantly more effective in reducing the endogenous  $\text{Ca}^{2+}$ -activated currents of *X. laevis* oocytes (Figure 4F,  $P < 0.05$ , ANOVA with post-hoc HSD Tukey). The increased efficacy of MONNA with respect to endogenous xTMEM16A in the egg is consistent with the observed difference in its fertilization-induced electrical profile over that of Ani9 (i.e. with MONNA completely blocking depolarization and Ani9 merely slowing it). Given that the mechanisms underlying channel inhibition by these chemically distinct agents have not yet been elucidated, we hypothesize that the differing effects of these inhibitors on eggs, in spite of their similar effects on oocytes are attributable to the strikingly different environments at these two developmental time points. Furthermore, we speculate that the elevated resting potential recorded from eggs inseminated in the presence of MONNA reflects the altered  $\text{Cl}^-$  homeostasis in these cells, consistent with a recent demonstration that TMEM16A activity plays a prominent role in  $\text{Cl}^-$  homeostasis [46].

Previous studies showed that fertilization-evoked depolarization varies with respect to amplitude and shape, even when recorded under control conditions [7, 14, 17]. Our study further demonstrates that the rate of depolarization varies for each unique fertilization event. Because the depolarization rate is directly proportional to the number of channels that open, our data imply that different fertilization events lead to the opening of different numbers of channels. Although the source of the  $\text{Ca}^{2+}$  that signals the fast block remains to be determined, the variance in TMEM16A channel activation in response to fertilization may reflect variance in changes in  $\text{Ca}^{2+}$  levels between different eggs. For example, if fertilization triggers TMEM16A opening by a pathway that involves receptor activation and second-messenger signaling, variation may reveal that some sperm activate multiple receptors whereas others activate only one. By contrast, if fertilization stimulates  $\text{Ca}^{2+}$  entry to trigger the fast block, variation may be related to different numbers of  $\text{Ca}^{2+}$ -permeant channels opening in response to fertilization. In

297 other systems, TMEM16A can be activated by either receptor activated second messenger  
298 signaling or Ca<sup>2+</sup> entry. For example, IP<sub>3</sub>-induced Ca<sup>2+</sup> release activates TMEM16A in DRG  
299 neurons [38]; whereas, Ca<sup>2+</sup> entry via TRPV6 channels activates TMEM16A in the epididymis  
300 [37].

301 Despite the gross changes that the plasma membrane of a *X. laevis* oocyte undergoes  
302 as it matures into a fertilization-competent egg, it is evident that the xTMEM16A channels are  
303 retained. Where in fertilization-competent eggs the xBEST2A channels localize remains to be  
304 determined. Based on its presence in the mature egg [28] and its lack of contribution to the fast  
305 block, we speculate that it is either desensitized or absent from the plasma membrane, as is the  
306 case for ORAI1 [23], PMCA [24], and Na<sup>+</sup>/K<sup>+</sup> ATPase [25].

307 In conclusion, the fertilization-activated opening of TMEM16A channels is the earliest  
308 known signaling event evoked by the sperm-egg interaction (Figure 5). The discovery of a  
309 critical role for TMEM16A channels in fertilization lays a foundation for understanding how the  
310 membrane potential regulates fertilization. More broadly, TMEM16A channels regulate diverse  
311 processes ranging from epithelial secretions [30] to smooth muscle contraction [50, 51]. These  
312 CaCCs are indispensable for human health [52]. Due to their large size, ease and reproducibility  
313 for electrophysiology recordings, and years of study by developmental biologists and  
314 biophysicists alike, we propose that *X. laevis* fertilization may serve as a straightforward model  
315 system to study the physiologic regulation of this critically important channel.

316

#### 317 **ACKNOWLEDGEMENTS**

318 We thank B.L. Mayfield and E.R. Rochon for excellent technical assistance. We thank L.A. Jaffe  
319 and K.I. Kiselyov for helpful discussions and advice. This work was supported by an Andrew  
320 Mellon Predoctoral Fellowship to K.L.W., a March of Dimes Foundation Basil O'Connor Grant 5-  
321 FY16-307 to M.T.L., and NIH grant R00HD69410 to A.E.C.

322

#### 323 **AUTHOR CONTRIBUTIONS**

324 K.L.W., M.L., and A.E.C. conceived of the research. K.L.W., W.A.P., M.T., M.L., and A.E.C.  
325 created the experiments, designed their implementation, planned analyses, and wrote the  
326 manuscript.

327

#### 328 **DECLARATION OF INTERESTS**

329 The authors declare no competing interests.

330

331

332

333

334

335

336

337

338  
339  
340  
341  
342  
343  
344  
345  
346  
347  
348  
349  
350  
351  
352  
353  
354  
355  
356  
357  
358  
359  
360  
361  
362  
363  
364  
365  
366  
367  
368  
369  
370  
371  
372  
373  
374  
375  
376  
377  
378  
379  
380  
381  
382  
383  
384  
385  
386  
387  
388

## References:

1. Iwao, Y. (2012). Egg activation in physiological polyspermy. *Reproduction* 144, 11-22.
2. Stricker, S.A. (1999). Comparative biology of calcium signaling during fertilization and egg activation in animals. *Dev Biol* 211, 157-176.
3. Wong, J.L., and Wessel, G.M. (2006). Defending the zygote: search for the ancestral animal block to polyspermy. *Curr Top Dev Biol* 72, 1-151.
4. Jaffe, L.A. (1976). Fast block to polyspermy in sea urchin eggs is electrically mediated. *Nature* 261, 68-71.
5. Jaffe, L.A., Cross, N.L., and Picheral, B. (1983). Studies of the voltage-dependent polyspermy block using cross-species fertilization of amphibians. *Dev Biol* 98, 319-326.
6. Gilbert, S. (2006). *Developmental Biology*, 8 Edition, (Sunderland, MA: Sinauer Associates, Inc.).
7. Cross, N.L., and Elinson, R.P. (1980). A fast block to polyspermy in frogs mediated by changes in the membrane potential. *Dev Biol* 75, 187-198.
8. Jaffe, L.A., Sharp, A.P., and Wolf, D.P. (1983). Absence of an electrical polyspermy block in the mouse. *Developmental biology* 96, 317-323.
9. Gould, L.J.a.M. (1985). Polyspermy-Preventing Mechanisms. In *Biology of Fertilization*, Volume 3, C.M.a.A. Monroy, ed. (London, UK: Academic Press Inc.), pp. 223 - 250.
10. Brawley, S.H. (1991). The fast block against polyspermy in fucoid algae is an electrical block. *Dev Biol* 144, 94-106.
11. Miyazaki, S., and Hirai, S. (1979). Fast polyspermy block and activation potential. Correlated changes during oocyte maturation of a starfish. *Dev Biol* 70, 327-340.
12. Gould-Somero, M., Jaffe, L.A., and Holland, L.Z. (1979). Electrically mediated fast polyspermy block in eggs of the marine worm, *Urechis caupo*. *J Cell Biol* 82, 426-440.
13. Charbonneau, M., Moreau, M., Picheral, B., Vilain, J.P., and Guerrier, P. (1983). Fertilization of amphibian eggs: a comparison of electrical responses between anurans and urodeles. *Dev Biol* 98, 304-318.
14. Grey, R.D., Bastiani, M.J., Webb, D.J., and Schertel, E.R. (1982). An electrical block is required to prevent polyspermy in eggs fertilized by natural mating of *Xenopus laevis*. *Dev Biol* 89, 475-484.
15. Hille, B. (2001). *Ion Channels of Excitable Membranes*, (Sunderland, MA: Sinauer Associates, Inc.).
16. Glahn, D., and Nuccitelli, R. (2003). Voltage-clamp study of the activation currents and fast block to polyspermy in the egg of *Xenopus laevis*. *Dev Growth Differ* 45, 187-197.
17. Webb, D.J., and Nuccitelli, R. (1985). Fertilization potential and electrical properties of the *Xenopus laevis* egg. *Dev Biol* 107, 395-406.
18. Cruz-Rangel, S., De Jesus-Perez, J.J., Contreras-Vite, J.A., Perez-Cornejo, P., Hartzell, H.C., and Arreola, J. (2015). Gating modes of calcium-activated chloride channels TMEM16A and TMEM16B. *J Physiol* 593, 5283-5298.
19. Hartzell, H.C., Yu, K., Xiao, Q., Chien, L.T., and Qu, Z. (2009). Anoctamin/TMEM16 family members are Ca<sup>2+</sup>-activated Cl<sup>-</sup> channels. *J Physiol* 587, 2127-2139.
20. Kline, D. (1988). Calcium-dependent events at fertilization of the frog egg: injection of a calcium buffer blocks ion channel opening, exocytosis, and formation of pronuclei. *Dev Biol* 126, 346-361.
21. Schroeder, B.C., Cheng, T., Jan, Y.N., and Jan, L.Y. (2008). Expression cloning of TMEM16A as a calcium-activated chloride channel subunit. *Cell* 134, 1019-1029.
22. Rasar, M.A., and Hammes, S.R. (2006). The physiology of the *Xenopus laevis* ovary. *Methods in molecular biology* (Clifton, N.J.) 322, 17-30.



- 389 23. Yu, F., Sun, L., and Machaca, K. (2010). Constitutive recycling of the store-operated  
390 Ca<sup>2+</sup> channel Orai1 and its internalization during meiosis. *J Cell Biol* 191, 523-535.
- 391 24. El-Jouni, W., Jang, B., Haun, S., and Machaca, K. (2005). Calcium signaling  
392 differentiation during *Xenopus* oocyte maturation. *Dev Biol* 288, 514-525.
- 393 25. Mohanty, B.K., and Gupta, B.L. (2012). A marked animal-vegetal polarity in the  
394 localization of Na<sup>+</sup>,K<sup>+</sup>-ATPase activity and its down-regulation following progesterone-  
395 induced maturation. *Mol Reprod Dev* 79, 138-160.
- 396 26. Wylie, C.C., Brown, D., Godsave, S.F., Quarmby, J., and Heasman, J. (1985). The  
397 cytoskeleton of *Xenopus* oocytes and its role in development. *J Embryol Exp Morphol* 89  
398 *Suppl*, 1-15.
- 399 27. Session, A.M., Uno, Y., Kwon, T., Chapman, J.A., Toyoda, A., Takahashi, S., Fukui, A.,  
400 Hikosaka, A., Suzuki, A., Kondo, M., et al. (2016). Genome evolution in the allotetraploid  
401 frog *Xenopus laevis*. *Nature* 538, 336-343.
- 402 28. Wuhr, M., Freeman, R.M., Jr., Presler, M., Horb, M.E., Peshkin, L., Gygi, S.P., and  
403 Kirschner, M.W. (2014). Deep proteomics of the *Xenopus laevis* egg using an mRNA-  
404 derived reference database. *Curr Biol* 24, 1467-1475.
- 405 29. Caputo, A., Caci, E., Ferrera, L., Pedemonte, N., Barsanti, C., Sondo, E., Pfeiffer, U.,  
406 Ravazzolo, R., Zegarra-Moran, O., and Galletta, L.J. (2008). TMEM16A, a membrane  
407 protein associated with calcium-dependent chloride channel activity. *Science* 322, 590-  
408 594.
- 409 30. Yang, Y.D., Cho, H., Koo, J.Y., Tak, M.H., Cho, Y., Shim, W.S., Park, S.P., Lee, J., Lee,  
410 B., Kim, B.M., et al. (2008). TMEM16A confers receptor-activated calcium-dependent  
411 chloride conductance. *Nature* 455, 1210-1215.
- 412 31. Kane Dickson, V., Pedi, L., and Long, S.B. (2014). Structure and insights into the  
413 function of a Ca<sup>2+</sup>-activated Cl<sup>-</sup> channel. *Nature* 516, 213-218.
- 414 32. Qu, Z., and Hartzell, C. (2004). Determinants of anion permeation in the second  
415 transmembrane domain of the mouse bestrophin-2 chloride channel. *J Gen Physiol* 124,  
416 371-382.
- 417 33. Huang, F., Wong, X., and Jan, L.Y. (2012). International Union of Basic and Clinical  
418 Pharmacology. LXXXV: Calcium-Activated Chloride Channels. *Pharmacological*  
419 *Reviews* 64, 1-15.
- 420 34. Lee, M.T., Bonneau, A.R., and Giraldez, A.J. (2014). Zygotic genome activation during  
421 the maternal-to-zygotic transition. *Annu Rev Cell Dev Biol* 30, 581-613.
- 422 35. Tadros, W., and Lipshitz, H.D. (2009). The maternal-to-zygotic transition: a play in two  
423 acts. *Development* 136, 3033-3042.
- 424 36. Qu, Z., Wei, R.W., Mann, W., and Hartzell, H.C. (2003). Two bestrophins cloned from  
425 *Xenopus laevis* oocytes express Ca(2+)-activated Cl(-) currents. *J Biol Chem* 278,  
426 49563-49572.
- 427 37. Gao da, Y., Zhang, B.L., Leung, M.C., Au, S.C., Wong, P.Y., and Shum, W.W. (2016).  
428 Coupling of TRPV6 and TMEM16A in epithelial principal cells of the rat epididymis. *J*  
429 *Gen Physiol* 148, 161-182.
- 430 38. Jin, X., Shah, S., Liu, Y., Zhang, H., Lees, M., Fu, Z., Lippiat, J.D., Beech, D.J.,  
431 Sivaprasadarao, A., Baldwin, S.A., et al. (2013). Activation of the Cl<sup>-</sup> channel ANO1 by  
432 localized calcium signals in nociceptive sensory neurons requires coupling with the IP3  
433 receptor. *Sci Signal* 6, ra73.
- 434 39. Gyobu, S., Miyata, H., Ikawa, M., Yamazaki, D., Takeshima, H., Suzuki, J., and Nagata,  
435 S. (2015). A Role of TMEM16E Carrying a Scrambling Domain in Sperm Motility. *Mol*  
436 *Cell Biol* 36, 645-659.
- 437 40. Tran, T.T., Tobiume, K., Hirono, C., Fujimoto, S., Mizuta, K., Kubozono, K., Inoue, H.,  
438 Itakura, M., Sugita, M., and Kamata, N. (2014). TMEM16E (GDD1) exhibits protein

- 439 instability and distinct characteristics in chloride channel/pore forming ability. *J Cell*  
440 *Physiol* 229, 181-190.
- 441 41. Hammer, C., Wanitchakool, P., Sirianant, L., Papiol, S., Monnheim, M., Faria, D.,  
442 Ousingsawat, J., Schramek, N., Schmitt, C., Margos, G., et al. (2015). A Coding Variant  
443 of ANO10, Affecting Volume Regulation of Macrophages, Is Associated with *Borrelia*  
444 Seropositivity. *Mol Med* 21, 26-37.
- 445 42. Wanitchakool, P., Ousingsawat, J., Sirianant, L., Cabrita, I., Faria, D., Schreiber, R., and  
446 Kunzelmann, K. (2017). Cellular defects by deletion of ANO10 are due to deregulated  
447 local calcium signaling. *Cell Signal* 30, 41-49.
- 448 43. Moriyoshi, K., Richards, L.J., Akazawa, C., O'Leary, D.D., and Nakanishi, S. (1996).  
449 Labeling neural cells using adenoviral gene transfer of membrane-targeted GFP. *Neuron*  
450 16, 255-260.
- 451 44. Namkung, W., Phuan, P.W., and Verkman, A.S. (2011). TMEM16A inhibitors reveal  
452 TMEM16A as a minor component of calcium-activated chloride channel conductance in  
453 airway and intestinal epithelial cells. *J Biol Chem* 286, 2365-2374.
- 454 45. Oh, S.J., Hwang, S.J., Jung, J., Yu, K., Kim, J., Choi, J.Y., Hartzell, H.C., Roh, E.J., and  
455 Lee, C.J. (2013). MONNA, a potent and selective blocker for transmembrane protein  
456 with unknown function 16/anoctamin-1. *Mol Pharmacol* 84, 726-735.
- 457 46. Seo, Y., Lee, H.K., Park, J., Jeon, D.K., Jo, S., Jo, M., and Namkung, W. (2016). Ani9, A  
458 Novel Potent Small-Molecule ANO1 Inhibitor with Negligible Effect on ANO2. *PLoS One*  
459 11, e0155771.
- 460 47. De La Fuente, R., Namkung, W., Mills, A., and Verkman, A.S. (2008). Small-molecule  
461 screen identifies inhibitors of a human intestinal calcium-activated chloride channel. *Mol*  
462 *Pharmacol* 73, 758-768.
- 463 48. Liu, Y., Zhang, H., Huang, D., Qi, J., Xu, J., Gao, H., Du, X., Gamper, N., and Zhang, H.  
464 (2015). Characterization of the effects of Cl<sup>-</sup> channel modulators on TMEM16A and  
465 bestrophin-1 Ca<sup>2+</sup> activated Cl<sup>-</sup> channels. *Pflugers Arch* 467, 1417-1430.
- 466 49. Cross, N.L. (1981). Initiation of the activation potential by an increase in intracellular  
467 calcium in eggs of the frog, *Rana pipiens*. *Dev Biol* 85, 380-384.
- 468 50. Bulley, S., Neeb, Z.P., Burris, S.K., Bannister, J.P., Thomas-Gatewood, C.M.,  
469 Jangsangthong, W., and Jaggar, J.H. (2012). TMEM16A/ANO1 channels contribute to  
470 the myogenic response in cerebral arteries. *Circ Res* 111, 1027-1036.
- 471 51. Huang, F., Rock, J.R., Harfe, B.D., Cheng, T., Huang, X., Jan, Y.N., and Jan, L.Y.  
472 (2009). Studies on expression and function of the TMEM16A calcium-activated chloride  
473 channel. *Proc Natl Acad Sci U S A* 106, 21413-21418.
- 474 52. Rock, J.R., Futtner, C.R., and Harfe, B.D. (2008). The transmembrane protein  
475 TMEM16A is required for normal development of the murine trachea. *Dev Biol* 321, 141-  
476 149.
- 477 53. Kim, D., Langmead, B., and Salzberg, S.L. (2015). HISAT: a fast spliced aligner with low  
478 memory requirements. *Nat Methods* 12, 357-360.
- 479 54. Liao, Y., Smyth, G.K., and Shi, W. (2014). featureCounts: an efficient general purpose  
480 program for assigning sequence reads to genomic features. *Bioinformatics* 30, 923-930.
- 481 55. Brunner, J.D., Lim, N.K., Schenck, S., Duerst, A., and Dutzler, R. (2014). X-ray structure  
482 of a calcium-activated TMEM16 lipid scramblase. *Nature* 516, 207-212.
- 483 56. Yang, T., Liu, Q., Kloss, B., Bruni, R., Kalathur, R.C., Guo, Y., Kloppmann, E., Rost, B.,  
484 Colecraft, H.M., and Hendrickson, W.A. (2014). Structure and selectivity in bestrophin  
485 ion channels. *Science* 346, 355-359.
- 486 57. Wozniak, K.L., Mayfield, B.L., Duray, A.M., Tembo, M., Beleny, D.O., Napolitano, M.A.,  
487 Sauer, M.L., Wisner, B.W., and Carlson, A.E. (2017). Extracellular Ca<sup>2+</sup> Is Required for  
488 Fertilization in the African Clawed Frog, *Xenopus laevis*. *PLoS One* 12, e0170405.

- 489 58. Heasman, J., Holwill, S., and Wylie, C.C. (1991). Fertilization of cultured *Xenopus*  
490 oocytes and use in studies of maternally inherited molecules. *Methods Cell Biol* 36, 213-  
491 230.
- 492 59. Wallace, R.A., Jared, D.W., Dumont, J.N., and Sega, M.W. (1973). Protein incorporation  
493 by isolated amphibian oocytes. 3. Optimum incubation conditions. *J Exp Zool* 184, 321-  
494 333.
- 495 60. Seiler, C.Y., Park, J.G., Sharma, A., Hunter, P., Surapaneni, P., Sedillo, C., Field, J.,  
496 Algar, R., Price, A., Steel, J., et al. (2014). DNASU plasmid and PSI:Biological-Materials  
497 repositories: resources to accelerate biological research. *Nucleic Acids Res* 42, D1253-  
498 1260.
- 499 61. Kredel, S., Oswald, F., Nienhaus, K., Deuschle, K., Rocker, C., Wolff, M., Heilker, R.,  
500 Nienhaus, G.U., and Wiedenmann, J. (2009). mRuby, a bright monomeric red  
501 fluorescent protein for labeling of subcellular structures. *PLoS One* 4, e4391.
- 502 62. Schneider, C.A., Rasband, W.S., and Eliceiri, K.W. (2012). NIH Image to ImageJ: 25  
503 years of image analysis. *Nat Methods* 9, 671-675.

504

505

506 **FIGURE LEGENDS:**  
507

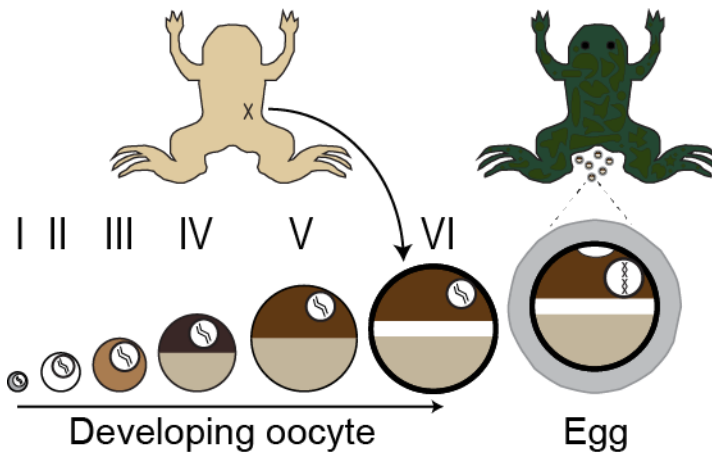

508  
509 **Figure 1.** Schematic depiction of gamete development in female *X. laevis*. Immature oocytes,  
510 ranging from the youngest (stage I) to the most developed (stage VI), are located within the  
511 ovaries. These oocytes can be surgically removed from the abdomen of the frog (shown in  
512 ventral view at top left) and are commonly used by electrophysiologists. Upon hormonal  
513 induction, stage VI oocytes mature into fertilization-competent eggs, which are laid by the frog  
514 (shown in dorsal view at top right). Oocytes and eggs differ with respect to membrane-localized  
515 proteins as well as the structure of the cytoskeleton.  
516  
517



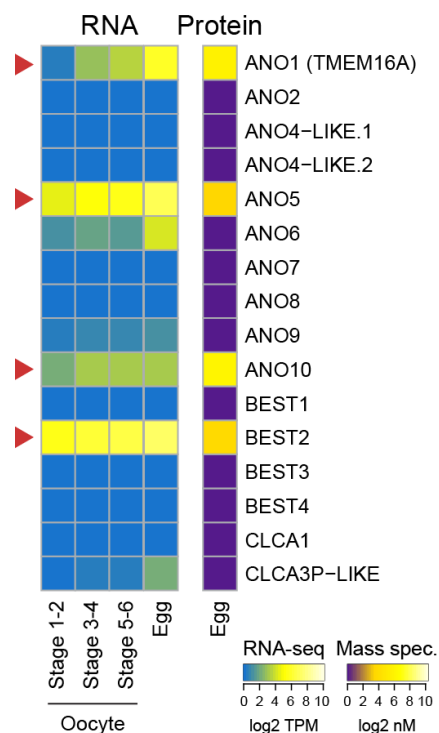

518 **Figure 2.** Expression of CaCCs in *X. laevis* oocytes and eggs. Heatmaps of expression levels  
519 CaCCs at the developmental stages indicated. (Right) Protein concentrations (from [28]) as  
520 determined by mass spectrometry-based proteomics study, in log<sub>2</sub> nanomolar. (Left) Transcript  
521 levels (shown as transcripts per million (TPM), from [27]), as determined by RNA-seq-based  
522 transcriptome study). Red arrows highlight CaCCs with proteins found in eggs.  
523  
524

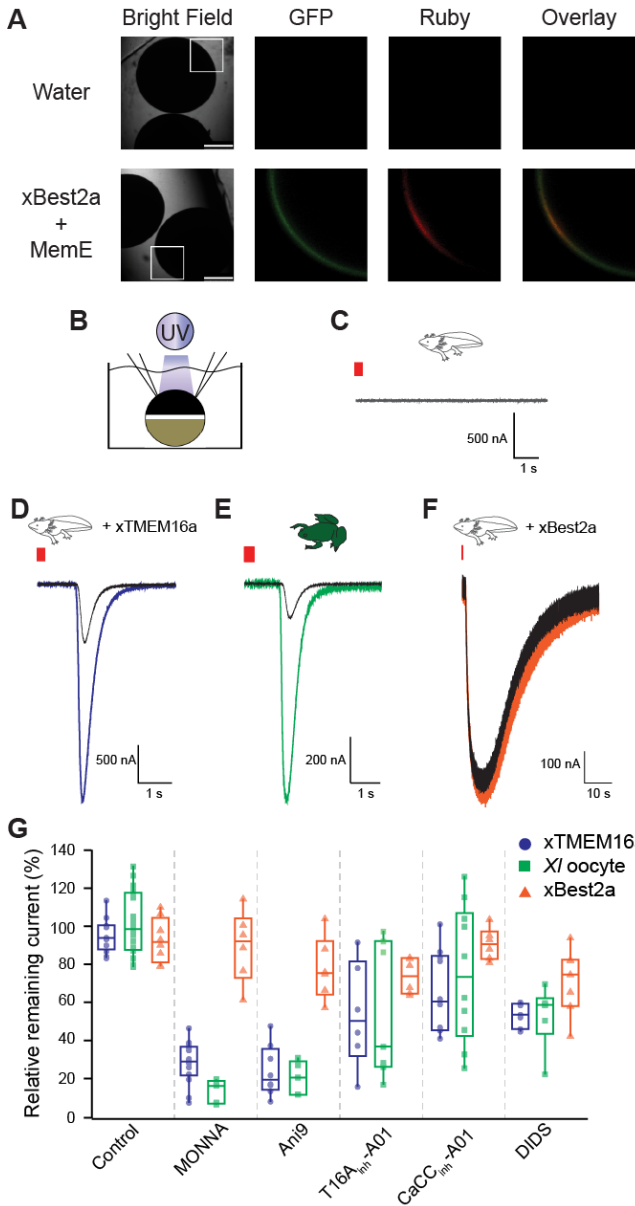

525 **Figure 3.** *MONNA* and *Ani9* inhibit *TMEM16A*-conducted *Cl* currents. (A) Representative  
 526 bright-field and fluorescence images of axolotl oocytes expressing Ruby-tagged xBEST2a and  
 527 eGFP-tagged MemE (reporter of plasma membrane). Boxes denote portions included in  
 528 fluorescence images, and scale bar denotes 750  $\mu$ m. Overlay is of GFP and Ruby images. (B)  
 529 Schematic of experimental design: UV photolysis to uncage  $IP_3$  while conducting TEVC. C-F)  
 530 Current recordings from oocytes of (C-D & F) axolotls or (E) *X. laevis*, following injection with a  
 531 photolabile caged  $IP_3$  analog, with clamping at -80 mV. Axolotl oocytes expressed (C) no  
 532 transgene, (D) xTMEM16A, or (F) xBEST2A. (E) Wild-type *X. laevis* oocytes expressing  
 533 endogenous channels. Typical current traces before and after uncaging, during (colored) control  
 534 treatment and (black) in the presence of 10  $\mu$ M MONNA. Red bar denotes the 250 ms duration  
 535 of UV exposure. (G) Averaged proportion of current remaining after application of the indicated  
 536 inhibitors, in axolotl oocytes expressing xTMEM16A (N=6-14) or xBEST2A (N=6-8), and in *X.*  
 537 *laevis* oocytes expressing endogenous channels (N=5-16).  
 538

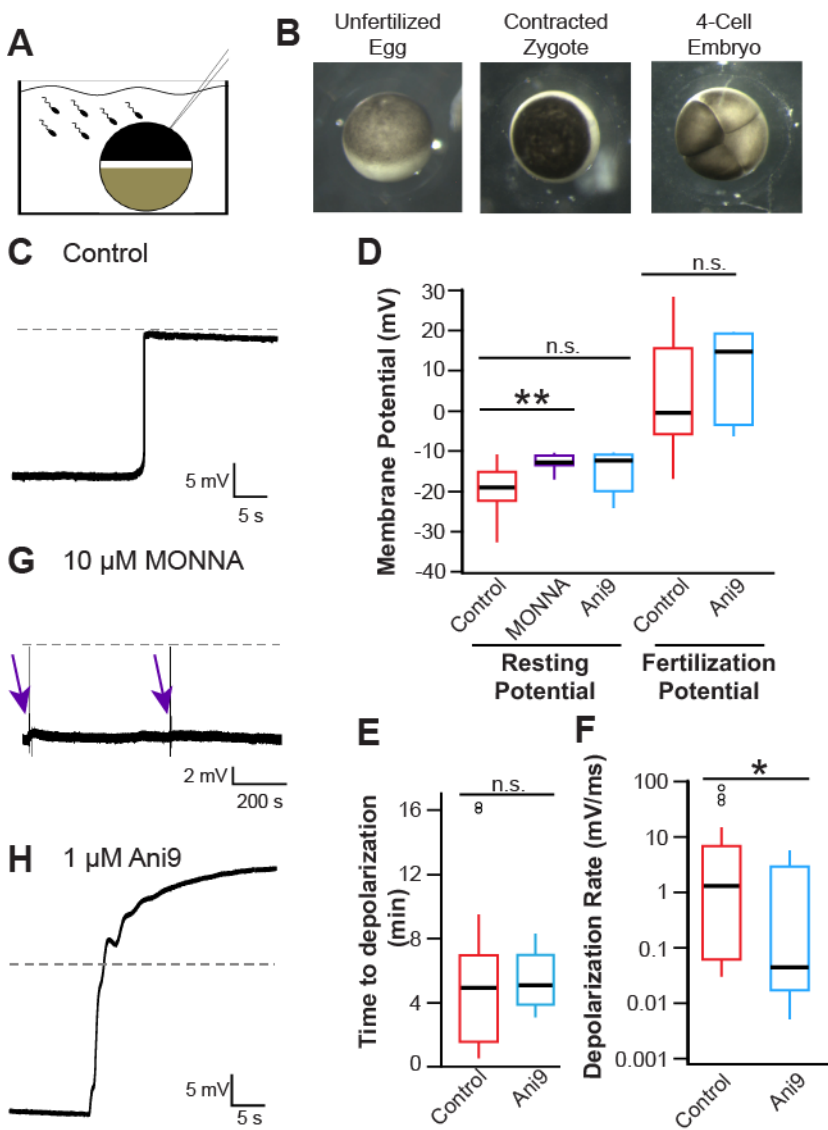

539 **Figure 4.** Fertilization activates *TMEM16A* to depolarize the egg. (A) Schematic depiction of  
 540 experimental design: whole-cell recordings made on *X. laevis* eggs during fertilization. (B)  
 541 Images of *X. laevis* (left) egg before sperm addition, (center) egg approximately 15 minutes after  
 542 fertilization with animal pole contracted, and (right) 4-cell embryo. Representative whole-cell  
 543 recordings made during fertilization in (C) control conditions, (G) the presence of 10  $\mu$ M  
 544 MONNA, (H) or the presence of 1  $\mu$ M Ani9. Dashed lines denote 0 mV, purple arrows denote  
 545 times at which sperm was applied to eggs in the presence of 10  $\mu$ M MONNA. D-F) Tukey box  
 546 plot distributions of (D) the resting and fertilization potentials in control conditions and with  
 547 MONNA or Ani9, (E) the time between sperm application and depolarization in the absence and  
 548 presence of Ani9, and (F) the depolarization rate in the absence and presence of Ani9 (N=5-30).  
 549 \*\* denotes  $P < 0.001$ , \* denotes  $P < 0.05$ , and n.s. denotes  $P > 0.05$ .  
 550  
 551

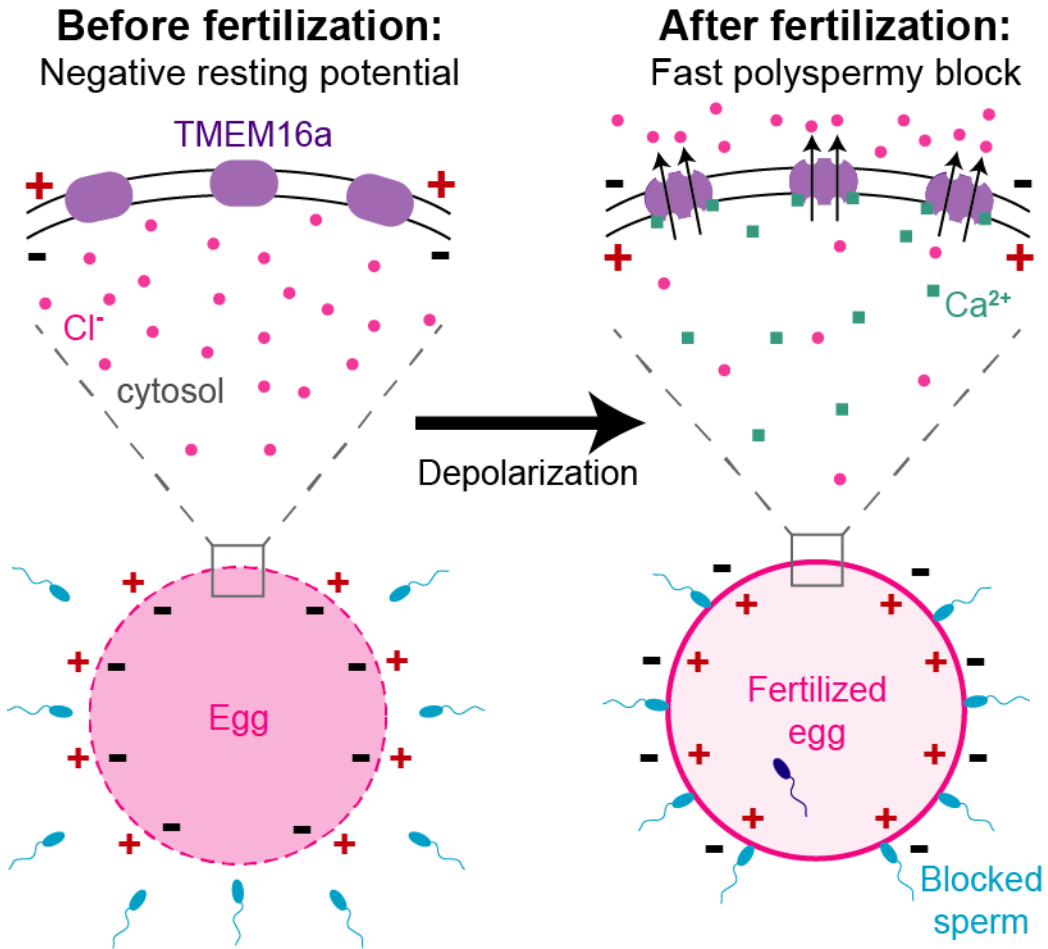

552 **Figure 5.** Proposed model for fertilization signaled activation of TMEM16A. Before fertilization,  
553 *X. laevis* eggs have a negative resting potential; thereby signaling to sperm that they can  
554 receive a male gamete. After fertilization, cytosolic Ca<sup>2+</sup> increases to activate TMEM16a. An  
555 efflux of Cl<sup>-</sup> then depolarizes the egg, and this change in membrane potential blocks  
556 supernumerary sperm from entering the fertilized egg.  
557  
558



559  
560  
561  
562

## SUPPORTING INFORMATION

### FIGURE LEGENDS

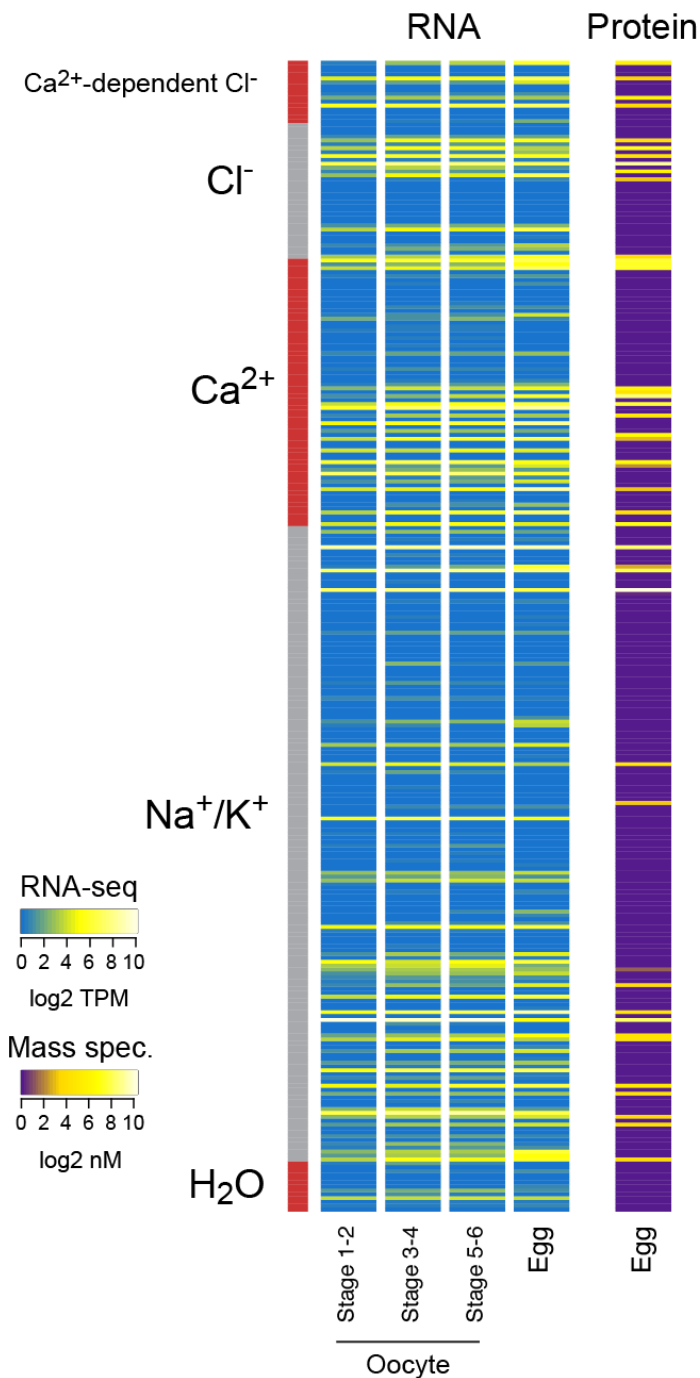

563  
564  
565  
566  
567

**FIGURE S1:** Heatmaps showing (*left*) RNA expression levels (based on RNA-seq from [27]), as  $\log_2$  transcripts per million (TPM), and (*right*) protein concentrations (based on mass spectrometry from [28]) in  $\log_2$  nanomolar. Transcripts and proteins are grouped by channel type.

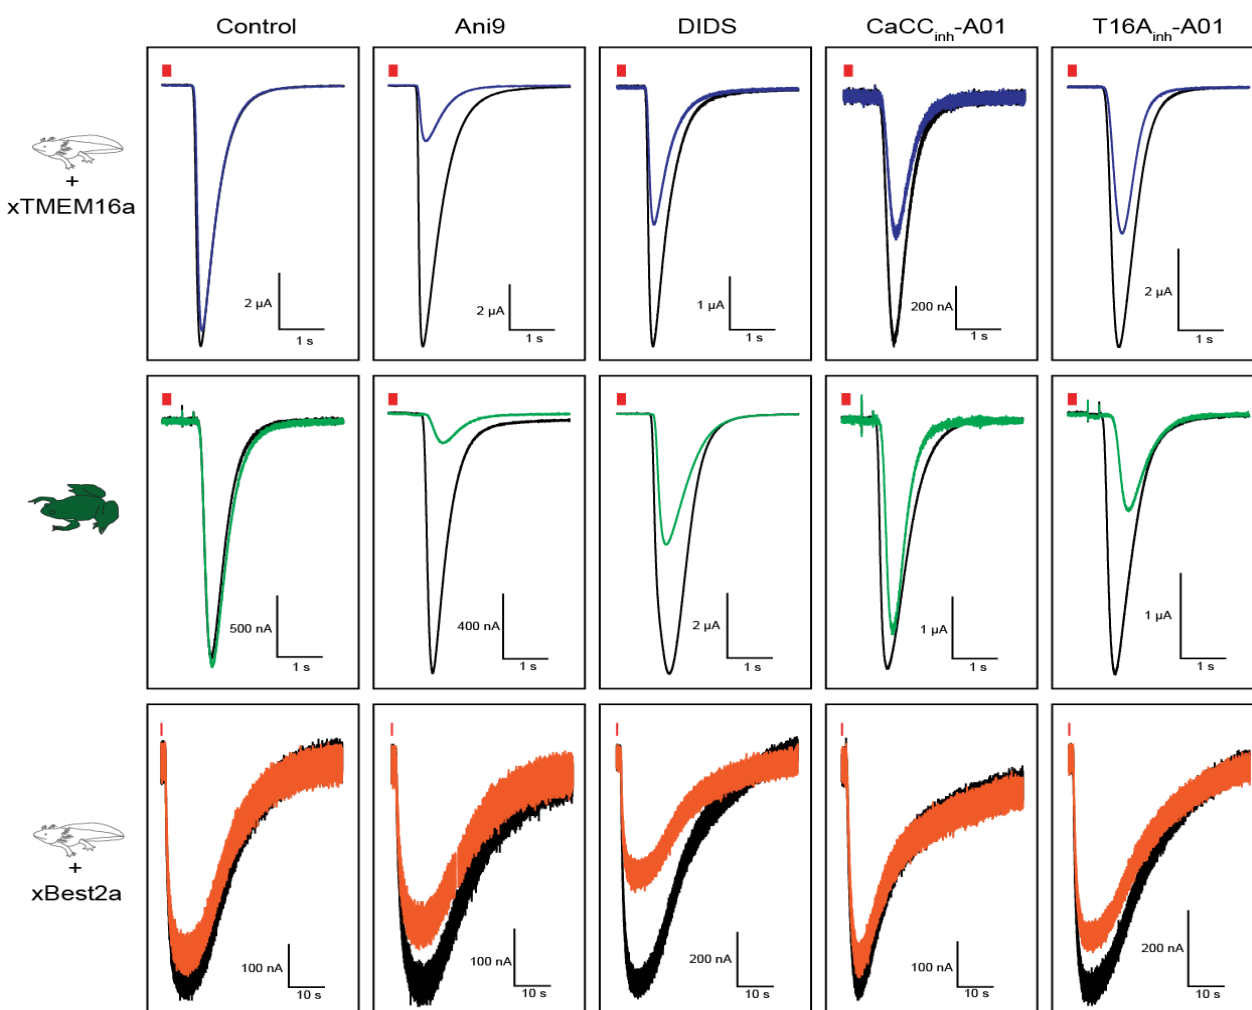

568 **FIGURE S2:** Representative current traces evoked by IP<sub>3</sub> uncaging in axolotl oocytes  
569 expressing (top) xTMEM16A or (bottom) xBEST2A, and in (middle) wild-type *X.*  
570 *laevis* oocytes. Shown are typical traces (black) before and (colored) after application of a  
571 control solution, Ani9, DIDS, CaCC<sub>inh</sub>-A01, or T16A<sub>inh</sub>-A01. The red bars denote the 250 ms UV-  
572 exposure.  
573  
574

575 **Dataset S1:** Gene Ontology terms used to identify channels; RNA-seq data from [27], of  
 576 channels in *X. laevis* oocytes during developmental stages 1-2, 3-4, and 5-6, and in fertilization-  
 577 competent eggs; and proteomics data from [28], from fertilization-competent *X. laevis* eggs.

578

579 **TABLE S1:** *Inhibition of Ca<sup>2+</sup>-activated current using Cl<sup>-</sup> channel inhibitors.*

580

|                                            | <b>Control</b> | <b>10 <math>\mu</math>M<br/>MONNA</b> | <b>1 <math>\mu</math>M<br/>Ani9</b> | <b>30 <math>\mu</math>M<br/>T16a<sub>inh</sub>-A01</b> | <b>10 <math>\mu</math>M<br/>CaCC<sub>inh</sub>-A01</b> | <b>7.5 <math>\mu</math>M<br/>DIDS</b> |
|--------------------------------------------|----------------|---------------------------------------|-------------------------------------|--------------------------------------------------------|--------------------------------------------------------|---------------------------------------|
| <b>xTMEM16A<br/>in axolotl<br/>oocytes</b> | 5 $\pm$ 3      | 72 $\pm$ 3                            | 76 $\pm$ 5                          | 46 $\pm$ 11                                            | 35 $\pm$ 7                                             | 46 $\pm$ 2                            |
| <b>XI oocytes</b>                          | 2 $\pm$ 4      | 87 $\pm$ 2                            | 80 $\pm$ 4                          | 45 $\pm$ 13                                            | 25 $\pm$ 11                                            | 47 $\pm$ 7                            |
| <b>xBEST2A<br/>in axolotl<br/>oocytes</b>  | 7 $\pm$ 4      | 10 $\pm$ 8                            | 22 $\pm$ 7                          | 26 $\pm$ 4                                             | 9 $\pm$ 3                                              | 29 $\pm$ 7                            |

581 Average  $\pm$  SEM percentage (%) of current inhibition seen for uncaging experiments. The  
 582 number of independent observations for each treatment is: MONNA (N=8-16); Ani9 (N=5-8);  
 583 T16a<sub>inh</sub>-A01 (N=6-7); CaCC<sub>inh</sub>-A01 (N=6-10); DIDS (N=6-7). XI: *Xenopus laevis*.  
 584

## 585 **METHODS**

### 586 **Materials**

587 N-((4-methoxy)-2-naphthyl)-5-nitroanthranilic acid (MONNA), 2-[(5-Ethyl-1,6-dihydro-4-  
588 methyl-6-oxo-2-pyrimidinyl)thio]-N-[4-(4-methoxyphenyl)-2-thiazolyl]-acetamide (T16A<sub>inh</sub>-A01),  
589 and 6-(1,1-Dimethylethyl)-2-[(2-furanylcarbonyl)amino]-4,5,6,7-tetrahydrobenzo[*b*]thiophene-3-  
590 carboxylic acid (CaCC<sub>inh</sub>-A01) were purchased from Sigma-Aldrich (St. Louis, MO), and 2-(4-  
591 chloro-2-methylphenoxy)-N-[(2-methoxyphenyl)methylideneamino]-acetamide (Ani9) from  
592 ChemDiv (San Diego, CA). Human chorionic gonadotropin (hCG) was purchased from Henry  
593 Schien (Melville, NY). All other materials, unless noted, were purchased from Thermo Fisher  
594 Scientific (Waltham, MA).

595

### 596 **Proteomic and RNA-seq analysis**

597 Paired-end raw RNA-seq reads from [27] were downloaded from the NCBI Sequence  
598 Read Archive (SRA) (<https://www.ncbi.nlm.nih.gov/sra>) (accession numbers SRX1287719,  
599 SRX1287720, SRX1287721, and SRX1287707). Reads were aligned using HISAT2 [53] in  
600 paired-end mode with default parameters to the *X. laevis* v9.1 genome, obtained from Xenbase  
601 (<http://www.xenbase.org>), then assigned to genes using featureCounts [54] on Xenbase-  
602 annotated gene models in paired-end mode allowing multi-mappers (-p -M).

603 To identify channel genes, we assembled 106 relevant gene ontology (GO) terms that  
604 distinguished the following classes of channels: Cl<sup>-</sup>, Ca<sup>2+</sup>, Na<sup>+</sup>, K<sup>+</sup>, and H<sub>2</sub>O (Dataset S1). To  
605 account for possible gaps in GO term annotation, all family members of any gene annotated into  
606 a channel category were also included in further analysis; for example, all TMEM16 family  
607 members regardless of their GO annotation were included in this analysis.

608 To estimate the number of channels in the egg, we combined the protein concentrations  
609 with the stoichiometry of the functional channel: two subunits for TMEM16a channels [55] and  
610 five for Best2 [31, 56]. We then assumed that *X. laevis* eggs are spherical, and calculated their  
611 volume based on their measured diameter of 1.4 mm [57].

612

### 613 **Solutions**

614 *Fertilization solutions*: Modified Ringers (MR) (in mM): 100 NaCl, 1.8 KCl, 2.0 CaCl<sub>2</sub>, 1.0  
615 MgCl<sub>2</sub>, and 5.0 HEPES, pH 7.8, and filtered using a sterile, 0.2 μm polystyrene filter [58].  
616 Fertilization recordings were made in our standard solution of 20% MR (also known as MR/5)  
617 with or without inhibitors, as indicated. After electrical recordings were made for fertilization  
618 experiments, embryos developed for two hours in 33% MR (MR/3). Various recordings were  
619 made in the presence of inhibitors, either diluted in water or ≤ 2% dimethyl sulfoxide (DMSO).

620 *Oocyte solutions*: Oocyte Ringers 2 (OR2) (in mM): 82.5 NaCl, 2.5 KCl, 1 MgCl<sub>2</sub>, and 5  
621 mM HEPES, pH 7.6 [59].

622 *Two-electrode voltage clamp solution*: ND96 (in mM): 96 NaCl, 2 KCl, 1 MgCl<sub>2</sub>, 10  
623 HEPES, pH 7.6 and filtered with a sterile, 0.2 μm polystyrene filter [21].

624

### 625 **Animals**

626 *Xenopus laevis* adults were obtained commercially (RRID: NXR\_0.0031, NASCO, Fort  
627 Atkinson, WI), as were axolotls, *Ambystoma mexicanum* (RRID: AGSC\_100A, Ambystoma  
628 Genetic Stock Center, Lexington, KY). *X. laevis* and axolotls were housed separately at 18 °C  
629 with 12/12-hour light/dark cycle.

630

631

### 632 **Collection of Gametes, Fertilization, and Developmental Assays**

633 All animal procedures were conducted using accepted standards of humane animal care  
634 and were approved by the Animal Care and Use Committee at the University of Pittsburgh.



635 *X. laevis* and axolotl oocytes were collected by procedures similar to those described  
636 previously [21, 57]. Briefly, ovarian sacs were obtained from *X. laevis* females anesthetized with  
637 a 30-minute immersion in 1.0 g/L tricaine-S (MS-222) at pH 7.4 and axolotls euthanized via  
638 immersion in 3.6 g/L tricaine-S at pH 7.4. For both sets of oocytes, ovarian sacs were manually  
639 pulled apart and incubated for 90 minutes in 1 mg/ml collagenase in ND96 supplemented with 5  
640 mM sodium pyruvate and 10 mg/L of gentamycin. Collagenase was removed by repeated  
641 washes with OR2, and healthy oocytes were sorted and stored at 14 °C in ND96 with sodium  
642 pyruvate and gentamycin.

643 Eggs were collected from sexually mature *X. laevis* females as previously described  
644 [57]. Briefly, females were injected 1,000 IU of hCG into their dorsal lymph sac and housed  
645 overnight for 12-16 hours at 14-16 °C. Typically, females began laying eggs within 2 hours of  
646 moving to room temperature. Eggs were collected on dry petri dishes and used within 10  
647 minutes of being laid.

648 Sperm were harvested from testes of sexually mature *X. laevis* males, as previously  
649 described [57]. Following euthanasia by a 30-minute immersion in 3.6 g/L tricaine-S (pH 7.4),  
650 testes were dissected. Cleaned testes were stored at 4 °C in MR for usage on the day of  
651 dissection or in L-15 medium for use up to one week later.

652 To create a sperm suspension, approximately 1/10 of a testis was minced in MR/5; if not  
653 used immediately, this solution was stored on ice and used for up to one hour. No more than  
654 three sperm additions were added to a given egg during whole cell recordings, and the total  
655 volume of sperm suspension added never exceeded 7.5% of the total fertilization solution. Eggs  
656 inseminated during whole cell recordings were transferred to MR/3 for up to 47 hours after  
657 insemination to monitor development. Development was assessed based on the appearance of  
658 cleavage furrows (Figure 4B), which were typically apparent approximately 90 minutes after  
659 sperm addition [57].

## 660 661 **Electrophysiology**

662 Electrophysiology recordings were made using TEV-200A amplifiers (Dagan Co.) and  
663 digitized by Axon Digidata 1550A (Molecular Devices). Data were acquired with pClamp  
664 Software (Molecular Devices) at a rate of 5 kHz.

665 IP<sub>3</sub>-evoked currents were recorded in the two-electrode voltage clamp (TEVC)  
666 configuration at -80 mV, from *X. laevis* or axolotl oocytes. The cDNA encoding the *X. laevis*  
667 xTMEM16A channel in the GEMHE vector was provided by L. Jan (University of California San  
668 Francisco) [21]. The cDNA encoding the xBEST2A channel was purchased from DNASU [60]  
669 and was engineered into the GEMHE vector with a carboxy-terminal Ruby tag [61] using  
670 overlapping PCR and Gibson assembly methods. The sequences for all constructs were verified  
671 by automated Sanger sequencing (Gene Wiz). The xTMEM16A and xBEST2A cRNAs were  
672 transcribed using the T7 mMessage mMachin Ultra kit (Ambion), and MemE with the SP6  
673 mMessage mMachin kit (Ambion). Defolliculated axolotl oocytes were injected with 5 ng of  
674 cRNA for xTMEM16a or xBest2a, as described previously [21]. Both axolotl and *X. laevis*  
675 oocytes were injected with the photolabile IP<sub>3</sub> analog: *myo*-inositol 1,4,5-trisphosphate, *P*4(5)-1-  
676 (2-nitrophenyl) ethyl ester (caged-IP<sub>3</sub>). Each oocyte was injected with a 200 μM caged-IP<sub>3</sub> stock  
677 made in DDH<sub>2</sub>O to reach a final concentration of 5 μM within the oocyte [21], and incubated in  
678 the dark at 18 °C for 1-5 hours before recording. Pipettes of 1-8 MΩ resistance were pulled from  
679 borosilicate glass and filled with 1 M KCl. The nitrophenyl cage on IP<sub>3</sub> was released by flash  
680 photolysis with a 250 ms exposure to light derived from the Ultra High Power White LED  
681 Illuminator (380-603 nm, Prizmatix) and guided by a liquid light source to the top of oocytes in  
682 our recording chambers (RC-26G, Warner Instruments). Using the TEVC technique, we  
683 recorded Ca<sup>2+</sup>-activated Cl<sup>-</sup> currents ranging from 0.2 to 17 μA, with an average of 6.9 ± 1.5 μA  
684 in *X. laevis* oocytes (N=16), 5.6 ± 1.0 μA (N=12) for xTMEM16a in axolotl oocytes, and 0.47 ±  
685 0.7 μA for xBest2a in axolotl oocytes. The bath solution was changed with the gravity fed, pinch

686 valve VC-8 solution changer (Warner Instruments). Background-subtracted peak currents were  
687 quantified from two consecutive recordings: one before and one with application of the tested  
688 inhibitors. The proportional difference between peak currents before and with inhibitor  
689 application for each oocyte was used to quantify the percent inhibition for each treatment. It is  
690 not possible to compare current amplitudes generated in different oocytes directly due to the  
691 innate variability of the experimental set-up (*i.e.* positioning of the UV light, exact amount of  
692 caged IP<sub>3</sub> in each oocyte, etc.).

693 Fertilization-evoked depolarizations were recorded in the whole cell configuration.  
694 Pipettes of 5-20 MΩ resistance were pulled from borosilicate glass and filled with 1 M KCl.  
695 Resting and fertilization potentials were generally stable and quantified approximately 10  
696 seconds before and after the depolarization, respectively. Depolarization rates were quantified  
697 by determining the maximum velocity of the quickest 1 mV shift in the membrane potential for  
698 each recording.

### 700 **Imaging**

701 Axolotl oocytes were imaged using a TCS SP5 confocal microscope (Leica  
702 Microsystems, Wetzlar, Germany) equipped with a Leica 506224 5X objective. As a membrane  
703 control, oocytes were injected with cRNA for a membrane anchored eGFP [43] which was *in*  
704 *vitro* transcribed using an SP6 mMessage mMachine kit (Ambion). EGFP was excited with a  
705 488 nm visible laser, whereas Ruby was excited with a 561 nm laser. Using a galvo scanner  
706 with unidirectional (600 Hz) scanning, sequential frames were captured with 2x line averaging.  
707 Images were analyzed using LAS AF (version 3.0.0 build 834) software and ImageJ [62].

### 709 **Quantification and Statistical Analyses**

710 All electrophysiology recordings were analyzed with Igor (WaveMetrics) and Excel  
711 (Microsoft). Averaged values ± standard error of the means (SEM), are reported for each  
712 experimental condition. T-tests (one-tailed for depolarization rates and two-tailed for resting and  
713 fertilization potentials and comparisons of relative amplitudes of IP<sub>3</sub>-evoked currents) were used  
714 to determine differences between inhibitor treatments. Depolarization rates were log<sub>10</sub>  
715 transformed before statistical analysis. ANOVAs followed by post-hoc HSF Tukey tests were  
716 used to compare different currents recorded with the same inhibitors.

717  
718
